# Supplementary material for: Rhodamine based turn-on dual mode chemosensor for the selective recognition of nickel ions: practical and theoretical applications
Source: Royal Society of Chemistry journal article supplement (doi:10.1039/d4ra08258c), 2025-01-01
Supplement: d4ra08258c1.pdf [file d4ra08258c1.pdf]

## SUPPORTING INFORMATION

### **Rhodamine based turn-on dual mode chemosensor for the selective recognition of nickel ions: practical and theoretical applications**

**Priya Takkar<sup>a</sup>, Swati Negi<sup>a</sup>, Rita Kakkar<sup>b</sup>, Rakesh Kumar<sup>a\*</sup>**

*<sup>a</sup> Bioorganic Laboratory, Department of Chemistry, University of Delhi, Delhi-110007, India*

*<sup>b</sup> Computational Chemistry Group, Department of Chemistry, University of Delhi, Delhi-110007, India*

*\*Email: rakeshkp@email.com*

### CONTENTS

- 1. Characterization Data of the synthesized compound P1**
- 2. <sup>1</sup>H, <sup>13</sup>C Spectra of the synthesized compound P1**
- 3. Density Functional Theory (DFT) Studies**

#### **1. Characterization Data of the synthesized compound P1**

**Synthesis of 3',6'-bis(diethylamino)-2-((2-(((E)-thiophen-2-ylmethylene)hydrazono)ethylidene)amino)spiro[isoindoline-1,9'-xanthen]-3-one (P1);** pure yellow product in 78% yield: m.p. 234-236 °C. <sup>1</sup>H NMR (400 MHz, DMSO) δ 8.76 (s, 1H), 8.04 (d, *J* = 8.3 Hz, 1H), 7.95 (d, *J* = 7.7 Hz, 2H), 7.83 (d, *J* = 4.9 Hz, 1H), 7.62 (d, *J* = 7.4 Hz, 2H), 7.56 (s, 1H), 7.22 – 7.19 (m, 1H), 7.06 (d, *J* = 7.3 Hz, 1H), 6.43 (d, *J* = 8.9 Hz, 4H), 6.36 (d, *J* = 9.0 Hz, 2H),

3.31 (s, 7H), 1.08 (s, 11H).  $^{13}\text{C}$  NMR (100 MHz, DMSO)  $\delta$  164.91, 160.16, 152.57, 149.18, 145.20, 138.34, 135.27, 128.89, 127.89, 124.25, 123.89, 121.47, 118.91, 112.02, 108.72, 104.60, 97.84, 88.56, 44.14, 12.87. HRMS data: calculated mass  $(\text{M} + \text{H})^+$ , 604.77; found, 604.77.

A  $^1\text{H}$  NMR titration experiment was conducted to investigate the binding relationship between P1 and  $\text{Ni}^{2+}$  by adding 1 equivalent of  $\text{Ni}^{2+}$  to P1 (Fig. S3). The introduction of  $\text{Ni}^{2+}$  led to a downfield shift of aromatic proton signals, suggesting that the spirolactam ring of P1 opens upon coordination with  $\text{Ni}^{2+}$  ions.

Supporting evidence for this interaction is supplied by the IR spectroscopy data (Fig. S4 and S5). The distinctive carbonyl amide stretching frequency at  $1692\text{ cm}^{-1}$  in free P1 was shown to disappear in the P1- $\text{Ni}^{2+}$  complex, indicating the participation of the carbonyl oxygen in coordination with  $\text{Ni}^{2+}$ . The results clearly confirm the proposed ring-opening mechanism and validate the 1:1 binding stoichiometry between P1 and  $\text{Ni}^{2+}$ .

## 2. $^1\text{H}$ and $^{13}\text{C}$ Spectra of the synthesized compound P1

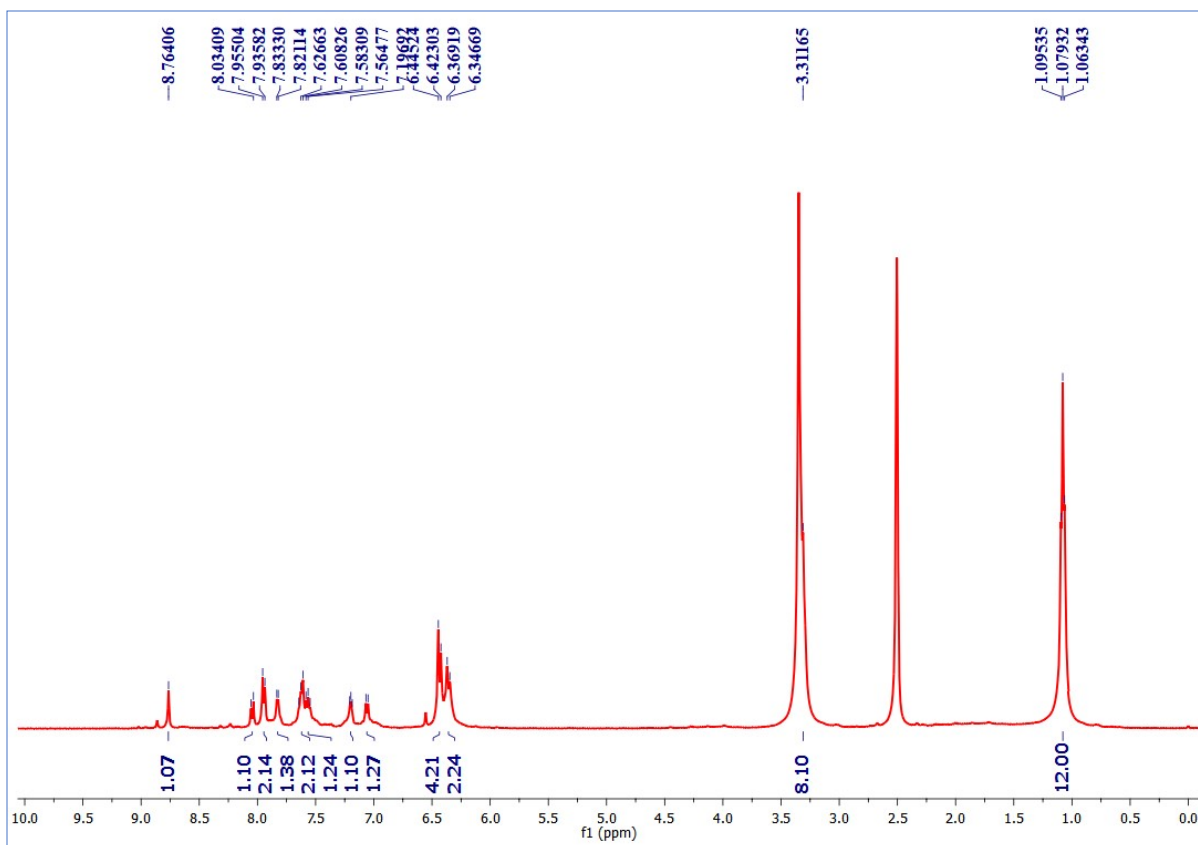

**Figure S1.**  $^1\text{H}$  NMR of chemosensor **P1** in DMSO 400MHz

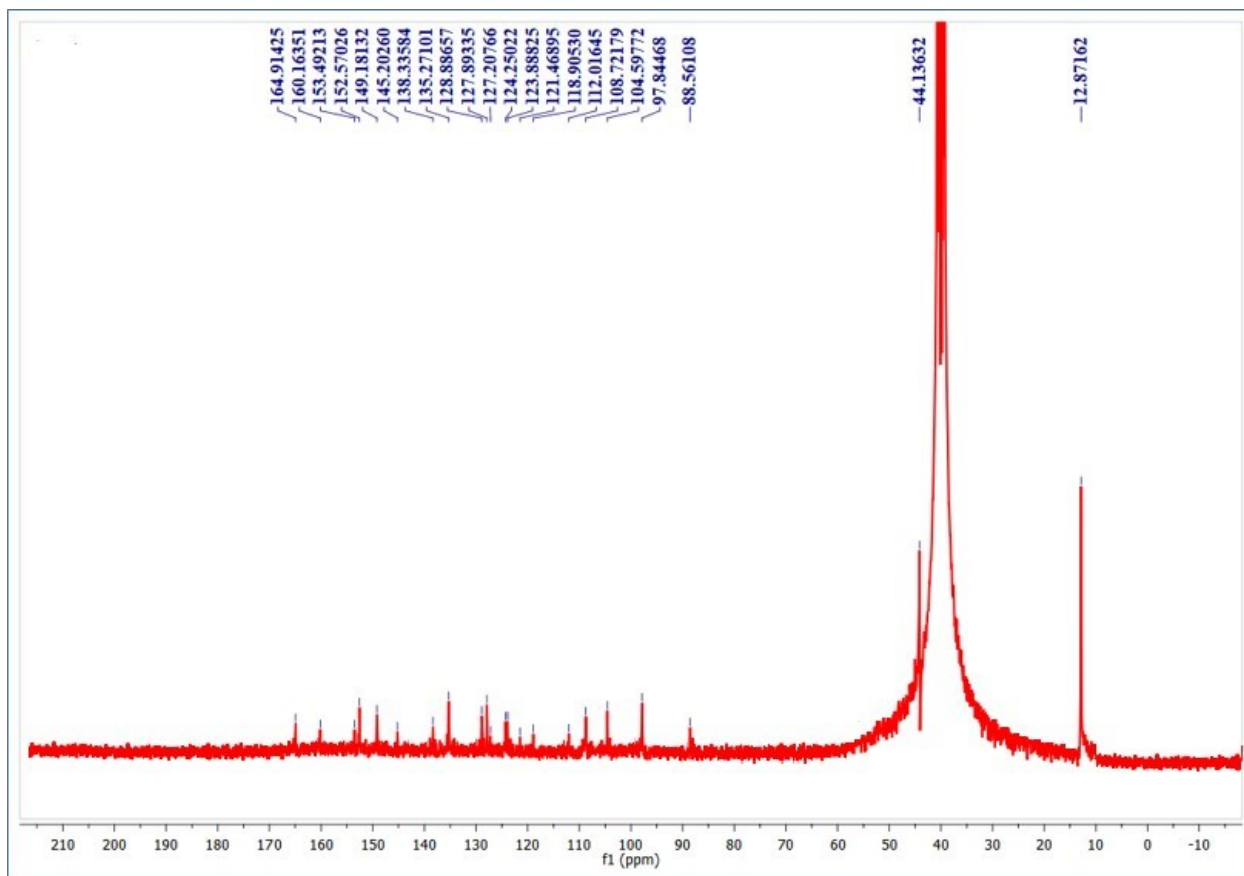

**Figure S2.**  $^{13}\text{C}$  NMR of chemosensor **P1** in DMSO 100MHz

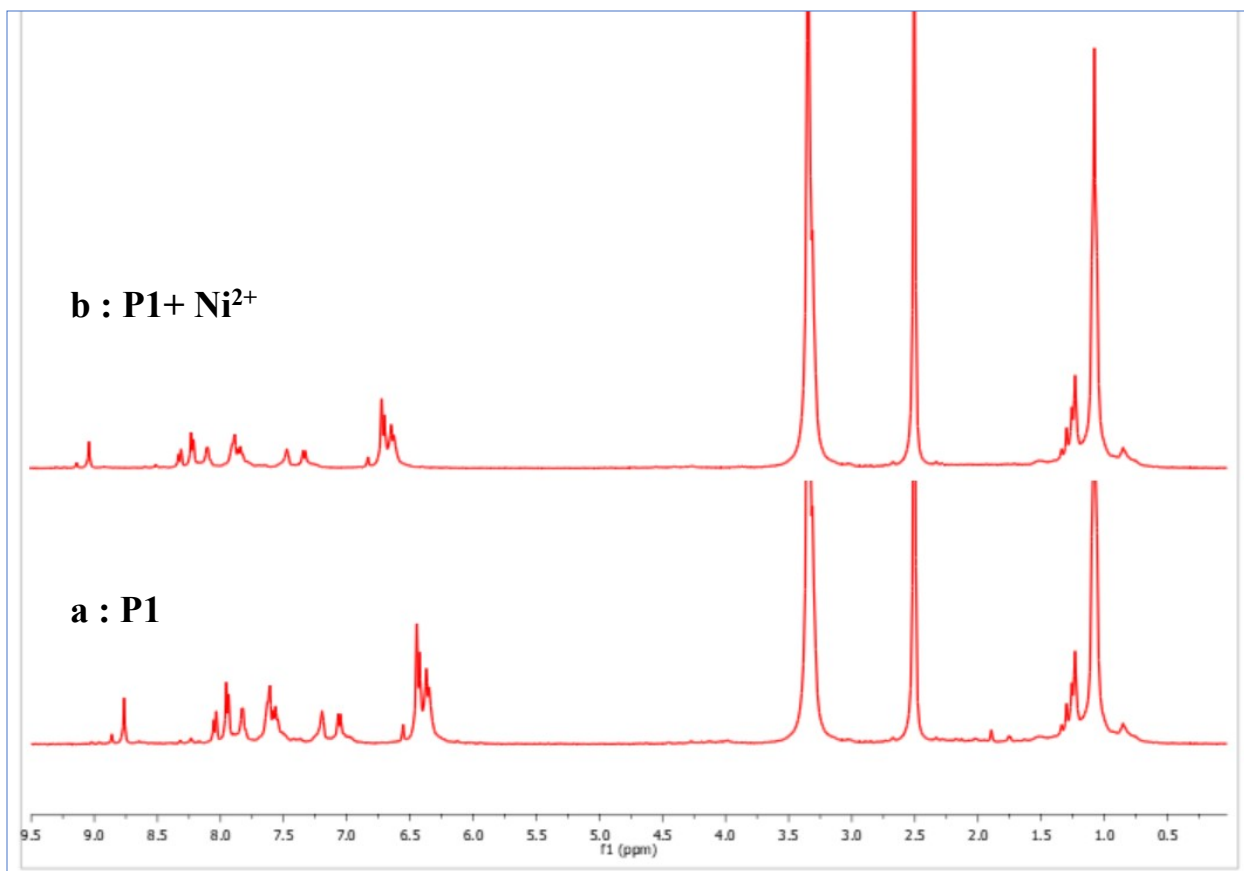

**Figure S3.** <sup>1</sup>H NMR titration of chemosensor **P1** and **P1- Ni<sup>2+</sup>** complex in DMSO  
400MHz

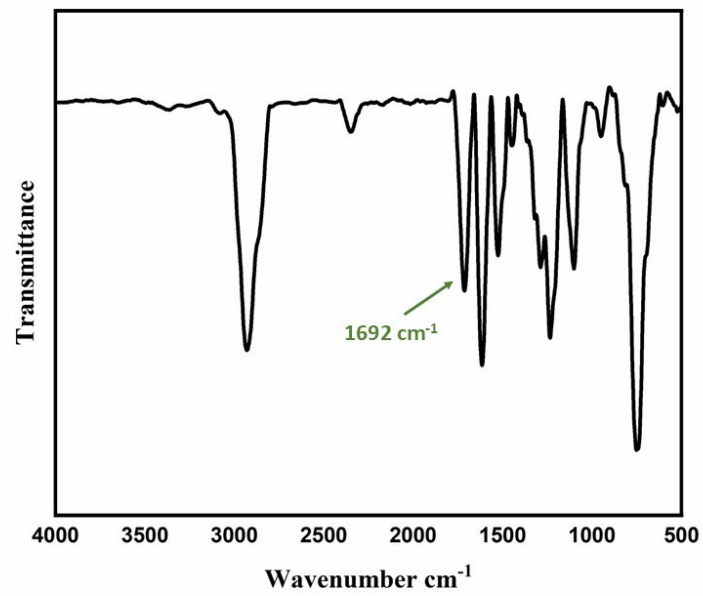

**Figure S4.** IR spectra of chemosensor **P1**

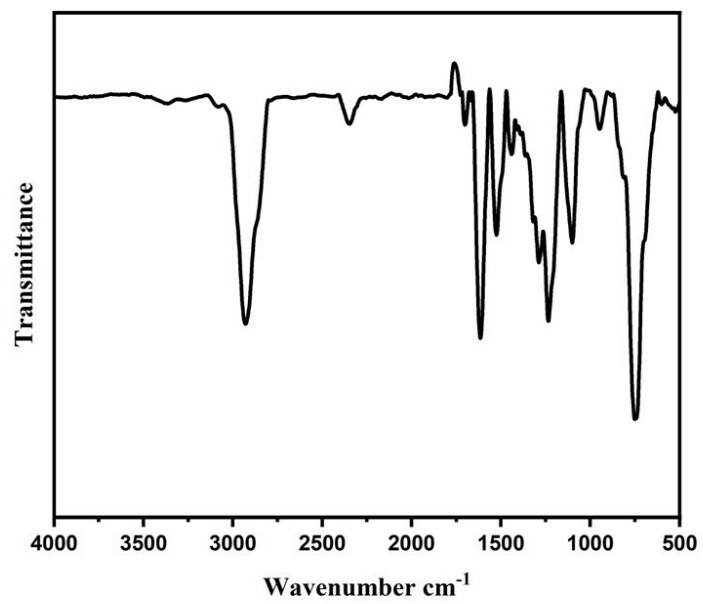

**Figure S5.** IR spectra of **P1-Ni<sup>2+</sup>** complex

Compound Table

| Compound Label         | RT    | Mass     | Abund   | Formula         | Tgt Mass | Diff (ppm) | MFG Formula     | DB Formula      |
|------------------------|-------|----------|---------|-----------------|----------|------------|-----------------|-----------------|
| Cpd 1: C35 H36 N6 O2 S | 0.128 | 604.2638 | 1346666 | C35 H36 N6 O2 S | 604.262  | 2.97       | C35 H36 N6 O2 S | C35 H36 N6 O2 S |

| Compound Label         | m/z      | RT    | Algorithm       | Mass     |
|------------------------|----------|-------|-----------------|----------|
| Cpd 1: C35 H36 N6 O2 S | 605.2702 | 0.128 | Find By Formula | 604.2638 |

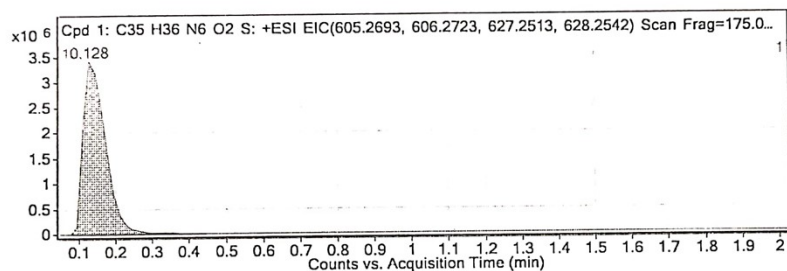

MS Spectrum

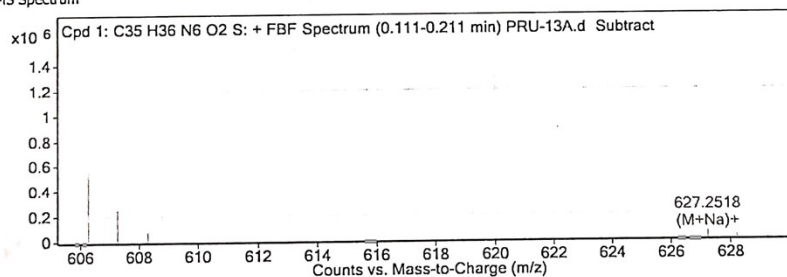

MS Zoomed Spectrum

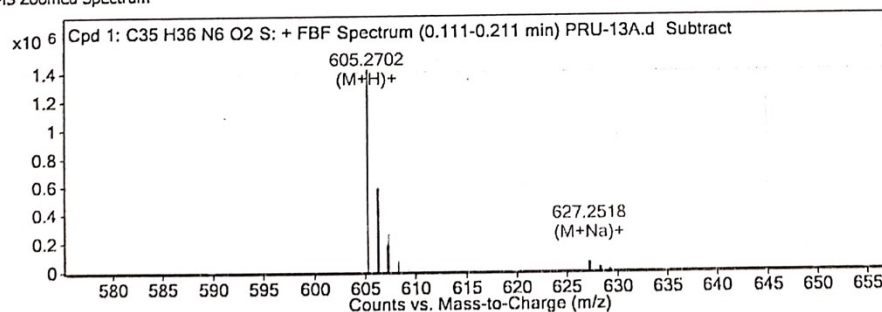

MS Spectrum Peak List

| m/z      | z | Abund      | Formula       | Ion     |
|----------|---|------------|---------------|---------|
| 605.2702 | 1 | 1346665.63 | C35H37N6O2S   | (M+H)+  |
| 606.2731 | 1 | 561065.19  | C35H37N6O2S   | (M+H)+  |
| 607.2781 | 1 | 264068.69  | C35H37N6O2S   | (M+H)+  |
| 608.2818 | 1 | 72219.39   | C35H37N6O2S   | (M+H)+  |
| 627.2518 | 1 | 52954.46   | C35H36N6NaO2S | (M+Na)+ |
| 628.2547 | 1 | 21726.07   | C35H36N6NaO2S | (M+Na)+ |
| 629.2605 | 1 | 11855.37   | C35H36N6NaO2S | (M+Na)+ |
| 630.2651 | 1 | 3973.69    | C35H36N6NaO2S | (M+Na)+ |

--- End Of Report ---

Figure S6. HRMS spectra of chemosensor P1

### 3. Density Functional Theory (DFT) Studies

#### Coordinates

P1

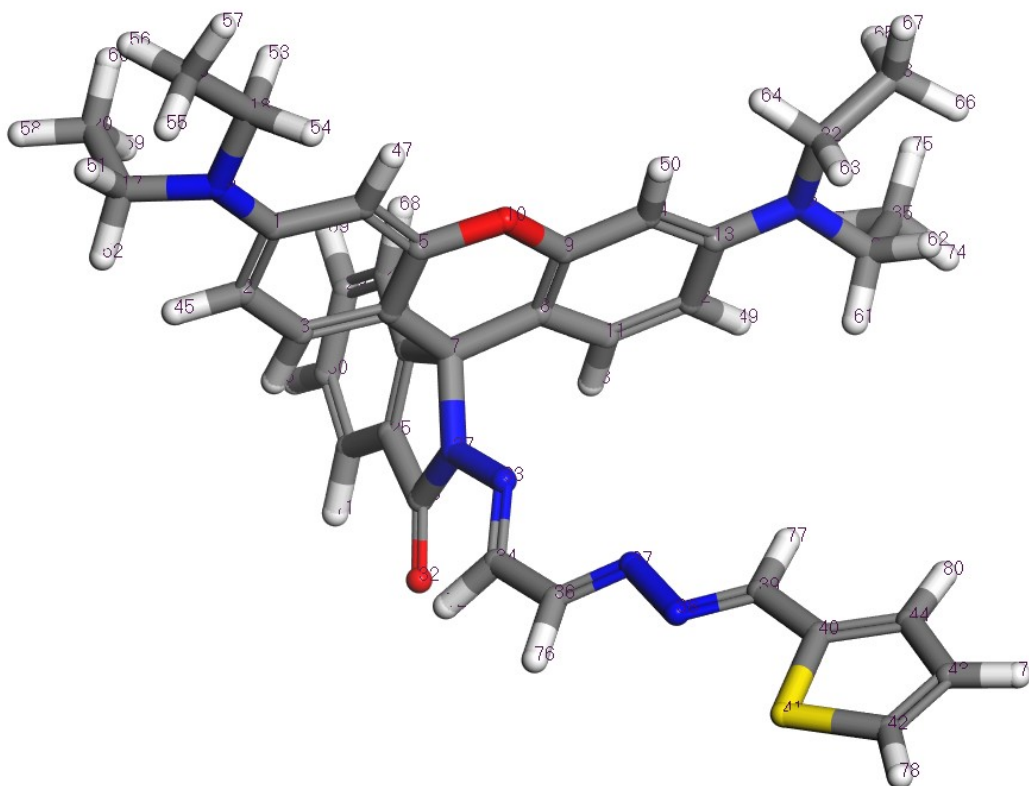

#### Final Coordinates (Angstroms)

---

| ATOM | X | Y         | Z         |           |
|------|---|-----------|-----------|-----------|
| 1    | C | -3.936287 | 1.419972  | 1.430051  |
| 2    | C | -4.392917 | 0.420215  | 0.522890  |
| 3    | C | -3.522506 | -0.180828 | -0.370691 |
| 4    | C | -2.154699 | 0.142499  | -0.433816 |
| 5    | C | -1.706512 | 1.105155  | 0.473928  |
| 6    | C | -2.560679 | 1.738800  | 1.384101  |
| 7    | C | -1.241485 | -0.488131 | -1.465473 |
| 8    | C | 0.135504  | 0.126119  | -1.408626 |
| 9    | C | 0.494574  | 1.060106  | -0.430538 |
| 10   | O | -0.389895 | 1.530669  | 0.527388  |
| 11   | C | 1.145109  | -0.239460 | -2.317457 |
| 12   | C | 2.428853  | 0.282294  | -2.260046 |
| 13   | C | 2.789904  | 1.227433  | -1.256125 |



|    |   |           |           |           |
|----|---|-----------|-----------|-----------|
| 14 | C | 1.781003  | 1.596803  | -0.338469 |
| 15 | N | 4.065824  | 1.764586  | -1.210606 |
| 16 | N | -4.802678 | 2.037630  | 2.324921  |
| 17 | C | -6.247223 | 1.997990  | 2.052601  |
| 18 | C | -4.281759 | 3.180428  | 3.098510  |
| 19 | C | -5.229804 | 3.717138  | 4.164011  |
| 20 | C | -6.693367 | 2.909629  | 0.905662  |
| 21 | C | 5.174341  | 1.048698  | -1.862427 |
| 22 | C | 4.417021  | 2.750096  | -0.180604 |
| 23 | C | 5.514082  | 3.727990  | -0.598830 |
| 24 | C | -1.871563 | -0.441204 | -2.849539 |
| 25 | C | -2.149306 | -1.726890 | -3.322938 |
| 26 | C | -1.691960 | -2.728709 | -2.344855 |
| 27 | N | -1.177147 | -1.998134 | -1.259715 |
| 28 | C | -2.204328 | 0.681119  | -3.602398 |
| 29 | C | -2.823552 | 0.483856  | -4.842682 |
| 30 | C | -3.111263 | -0.809982 | -5.314455 |
| 31 | C | -2.773196 | -1.933971 | -4.557529 |
| 32 | O | -1.706825 | -3.963548 | -2.442798 |
| 33 | N | -0.417879 | -2.444344 | -0.237207 |
| 34 | C | -0.535081 | -3.687283 | 0.149991  |
| 35 | C | 5.506206  | 1.544092  | -3.272554 |
| 36 | C | 0.364914  | -4.243736 | 1.139003  |
| 37 | N | 1.533212  | -3.728660 | 1.407209  |
| 38 | N | 2.218330  | -4.460874 | 2.362925  |
| 39 | C | 3.482939  | -4.137567 | 2.423422  |
| 40 | C | 4.382001  | -4.789462 | 3.326359  |
| 41 | S | 3.844318  | -6.009228 | 4.451267  |
| 42 | C | 5.440442  | -6.233732 | 5.045014  |
| 43 | C | 6.359228  | -5.415231 | 4.412074  |
| 44 | C | 5.757129  | -4.589676 | 3.433274  |
| 45 | H | -5.438208 | 0.122707  | 0.503949  |
| 46 | H | -3.920096 | -0.929296 | -1.059343 |
| 47 | H | -2.121693 | 2.499621  | 2.023957  |
| 48 | H | 0.908466  | -0.958725 | -3.104249 |
| 49 | H | 3.151814  | -0.031473 | -3.010464 |
| 50 | H | 1.968568  | 2.285194  | 0.480912  |
| 51 | H | -6.767069 | 2.272449  | 2.977797  |
| 52 | H | -6.538616 | 0.958638  | 1.855879  |
| 53 | H | -3.989837 | 4.001734  | 2.416047  |
| 54 | H | -3.360316 | 2.845383  | 3.595972  |
| 55 | H | -5.554238 | 2.927515  | 4.856647  |
| 56 | H | -6.120402 | 4.194889  | 3.733737  |
| 57 | H | -4.697035 | 4.480670  | 4.747506  |
| 58 | H | -7.782236 | 2.840190  | 0.767080  |
| 59 | H | -6.207920 | 2.624852  | -0.038610 |
| 60 | H | -6.442711 | 3.959516  | 1.116095  |
| 61 | H | 4.936099  | -0.024940 | -1.883963 |
| 62 | H | 6.058544  | 1.146840  | -1.215966 |
| 63 | H | 4.708722  | 2.238864  | 0.757179  |
| 64 | H | 3.517092  | 3.336609  | 0.039905  |
| 65 | H | 5.226329  | 4.288367  | -1.499586 |
| 66 | H | 6.474582  | 3.230715  | -0.789006 |
| 67 | H | 5.671605  | 4.445879  | 0.218234  |
| 68 | H | -1.990676 | 1.686313  | -3.237297 |
| 69 | H | -3.089019 | 1.347431  | -5.453636 |
| 70 | H | -3.602186 | -0.933796 | -6.280004 |
| 71 | H | -2.987538 | -2.944065 | -4.907622 |
| 72 | H | -1.299374 | -4.360186 | -0.242517 |
| 73 | H | 4.640656  | 1.451316  | -3.943240 |
| 74 | H | 6.331464  | 0.950228  | -3.693299 |
| 75 | H | 5.813286  | 2.598513  | -3.261220 |
| 76 | H | 0.052648  | -5.182072 | 1.616385  |
| 77 | H | 3.900365  | -3.370191 | 1.756683  |

|    |   |          |           |          |
|----|---|----------|-----------|----------|
| 78 | H | 5.620456 | -6.954476 | 5.838678 |
| 79 | H | 7.420659 | -5.413294 | 4.650103 |
| 80 | H | 6.294790 | -3.874582 | 2.813049 |

---

### DMol3/COSMO Results

| cosmo energy                  | [Hartree atomic units] | [eV]   | [kcal/mol] |
|-------------------------------|------------------------|--------|------------|
| Total energy                  | = -2230.749921         |        |            |
| Total energy + OC corr.       | = -2230.749921         |        |            |
| Dielectric (solvation) energy | = -0.042734            | -1.163 | -26.82     |
| Diell. energy + OC corr.      | = -0.042734            | -1.163 | -26.82     |

### Charge partitioning by Hirshfeld method: ( 0.00419)

|   |           |         |
|---|-----------|---------|
| C | 1 charge  | 0.0404  |
| C | 2 charge  | -0.0736 |
| C | 3 charge  | -0.0558 |
| C | 4 charge  | -0.0487 |
| C | 5 charge  | 0.0504  |
| C | 6 charge  | -0.0919 |
| C | 7 charge  | 0.0627  |
| C | 8 charge  | -0.0475 |
| C | 9 charge  | 0.0510  |
| O | 10 charge | -0.1001 |
| C | 11 charge | -0.0537 |
| C | 12 charge | -0.0769 |
| C | 13 charge | 0.0401  |
| C | 14 charge | -0.0928 |
| N | 15 charge | -0.0407 |
| N | 16 charge | -0.0492 |
| C | 17 charge | -0.0060 |
| C | 18 charge | -0.0044 |
| C | 19 charge | -0.0919 |
| C | 20 charge | -0.1017 |
| C | 21 charge | -0.0023 |
| C | 22 charge | -0.0031 |
| C | 23 charge | -0.0943 |
| C | 24 charge | 0.0064  |
| C | 25 charge | -0.0186 |
| C | 26 charge | 0.1339  |
| N | 27 charge | 0.0142  |
| C | 28 charge | -0.0376 |
| C | 29 charge | -0.0268 |
| C | 30 charge | -0.0360 |
| C | 31 charge | -0.0308 |
| O | 32 charge | -0.3063 |
| N | 33 charge | -0.1142 |
| C | 34 charge | 0.0100  |
| C | 35 charge | -0.1008 |
| C | 36 charge | 0.0171  |
| N | 37 charge | -0.1453 |
| N | 38 charge | -0.1581 |
| C | 39 charge | 0.0187  |
| C | 40 charge | -0.0370 |
| S | 41 charge | 0.1207  |
| C | 42 charge | -0.0563 |
| C | 43 charge | -0.0614 |
| C | 44 charge | -0.0480 |
| H | 45 charge | 0.0467  |
| H | 46 charge | 0.0402  |
| H | 47 charge | 0.0428  |
| H | 48 charge | 0.0424  |
| H | 49 charge | 0.0444  |

|   |    |        |        |
|---|----|--------|--------|
| H | 50 | charge | 0.0437 |
| H | 51 | charge | 0.0431 |
| H | 52 | charge | 0.0435 |
| H | 53 | charge | 0.0330 |
| H | 54 | charge | 0.0425 |
| H | 55 | charge | 0.0412 |
| H | 56 | charge | 0.0400 |
| H | 57 | charge | 0.0488 |
| H | 58 | charge | 0.0434 |
| H | 59 | charge | 0.0309 |
| H | 60 | charge | 0.0369 |
| H | 61 | charge | 0.0391 |
| H | 62 | charge | 0.0456 |
| H | 63 | charge | 0.0355 |
| H | 64 | charge | 0.0451 |
| H | 65 | charge | 0.0386 |
| H | 66 | charge | 0.0389 |
| H | 67 | charge | 0.0470 |
| H | 68 | charge | 0.0548 |
| H | 69 | charge | 0.0609 |
| H | 70 | charge | 0.0595 |
| H | 71 | charge | 0.0571 |
| H | 72 | charge | 0.0446 |
| H | 73 | charge | 0.0351 |
| H | 74 | charge | 0.0430 |
| H | 75 | charge | 0.0352 |
| H | 76 | charge | 0.0490 |
| H | 77 | charge | 0.0550 |
| H | 78 | charge | 0.0721 |
| H | 79 | charge | 0.0657 |
| H | 80 | charge | 0.0679 |

\*\*\*\*\*

### P1-Ni<sup>2+</sup> complex (singlet)

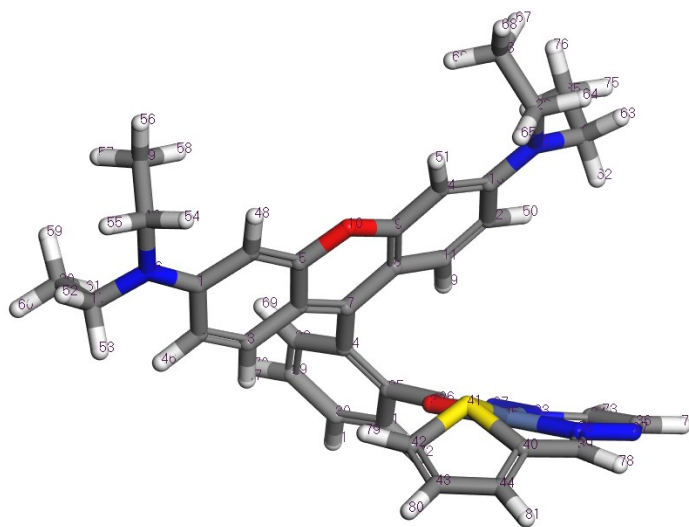

### Final Coordinates (Angstroms)

| ----- |      |           |          |          |
|-------|------|-----------|----------|----------|
|       | ATOM | X         | Y        | Z        |
| 1     | C    | -4.154427 | 0.083670 | 1.365438 |

|    |    |           |           |           |
|----|----|-----------|-----------|-----------|
| 2  | C  | -4.122776 | -1.000397 | 0.422463  |
| 3  | C  | -3.028921 | -1.215567 | -0.377867 |
| 4  | C  | -1.875472 | -0.375339 | -0.323836 |
| 5  | C  | -1.872150 | 0.593642  | 0.721990  |
| 6  | C  | -2.957607 | 0.826587  | 1.542154  |
| 7  | C  | -0.801466 | -0.413430 | -1.243448 |
| 8  | C  | 0.265555  | 0.504233  | -1.074690 |
| 9  | C  | 0.278259  | 1.361806  | 0.065644  |
| 10 | O  | -0.768949 | 1.374961  | 0.951678  |
| 11 | C  | 1.352322  | 0.674338  | -1.980454 |
| 12 | C  | 2.371318  | 1.564334  | -1.743577 |
| 13 | C  | 2.398795  | 2.369333  | -0.552305 |
| 14 | C  | 1.301889  | 2.247523  | 0.341019  |
| 15 | N  | 3.425050  | 3.224044  | -0.300194 |
| 16 | N  | -5.283867 | 0.388801  | 2.055416  |
| 17 | C  | -6.552447 | -0.320084 | 1.802543  |
| 18 | C  | -5.327963 | 1.554863  | 2.957106  |
| 19 | C  | -5.450006 | 2.899458  | 2.233341  |
| 20 | C  | -7.270549 | 0.128429  | 0.526586  |
| 21 | C  | 4.505477  | 3.443729  | -1.279058 |
| 22 | C  | 3.453614  | 4.035908  | 0.929235  |
| 23 | C  | 2.630014  | 5.324739  | 0.858944  |
| 24 | C  | -0.863768 | -1.312733 | -2.424423 |
| 25 | C  | 0.137823  | -2.263144 | -2.744749 |
| 26 | C  | 1.287958  | -2.518767 | -1.852449 |
| 27 | N  | 2.493278  | -2.652546 | -2.398377 |
| 28 | C  | -1.943337 | -1.152507 | -3.311079 |
| 29 | C  | -2.040707 | -1.907671 | -4.481803 |
| 30 | C  | -1.045555 | -2.837857 | -4.795384 |
| 31 | C  | 0.038852  | -3.007132 | -3.933879 |
| 32 | O  | 1.094391  | -2.589930 | -0.560263 |
| 33 | N  | 3.411507  | -2.821530 | -1.406046 |
| 34 | C  | 4.684395  | -2.877952 | -1.720794 |
| 35 | C  | 4.129485  | 4.401945  | -2.411586 |
| 36 | C  | 5.720824  | -3.048088 | -0.753269 |
| 37 | N  | 5.629603  | -3.214389 | 0.542729  |
| 38 | N  | 4.399930  | -3.199708 | 1.118664  |
| 39 | C  | 4.398968  | -3.589799 | 2.394386  |
| 40 | C  | 3.165627  | -3.580525 | 3.082023  |
| 41 | S  | 1.906030  | -2.595527 | 2.347326  |
| 42 | C  | 0.661386  | -3.516851 | 3.140549  |
| 43 | C  | 1.209778  | -4.393196 | 4.049175  |
| 44 | C  | 2.631916  | -4.447653 | 4.017410  |
| 45 | Ni | 2.729453  | -2.880525 | 0.304630  |
| 46 | H  | -4.979900 | -1.660762 | 0.317877  |
| 47 | H  | -3.049131 | -2.037117 | -1.092579 |
| 48 | H  | -2.872854 | 1.617180  | 2.283144  |
| 49 | H  | 1.370698  | 0.094581  | -2.902987 |
| 50 | H  | 3.161269  | 1.653962  | -2.484905 |
| 51 | H  | 1.211645  | 2.859800  | 1.234279  |
| 52 | H  | -7.188013 | -0.140367 | 2.678594  |
| 53 | H  | -6.356674 | -1.401364 | 1.778924  |
| 54 | H  | -4.432966 | 1.537186  | 3.596374  |
| 55 | H  | -6.187618 | 1.403092  | 3.621749  |
| 56 | H  | -5.448472 | 3.710357  | 2.975981  |
| 57 | H  | -6.384823 | 2.961604  | 1.659358  |
| 58 | H  | -4.610068 | 3.067240  | 1.544227  |
| 59 | H  | -7.539523 | 1.192781  | 0.570059  |
| 60 | H  | -8.196056 | -0.453975 | 0.409896  |
| 61 | H  | -6.648279 | -0.036010 | -0.364421 |
| 62 | H  | 4.826147  | 2.472087  | -1.680757 |
| 63 | H  | 5.358484  | 3.842145  | -0.714458 |
| 64 | H  | 4.507746  | 4.275216  | 1.120478  |
| 65 | H  | 3.118475  | 3.406727  | 1.766415  |

|    |   |           |           |           |
|----|---|-----------|-----------|-----------|
| 66 | H | 1.571660  | 5.121010  | 0.643552  |
| 67 | H | 3.014436  | 6.006062  | 0.088043  |
| 68 | H | 2.687450  | 5.839486  | 1.829571  |
| 69 | H | -2.701483 | -0.400075 | -3.089133 |
| 70 | H | -2.891039 | -1.758588 | -5.148693 |
| 71 | H | -1.113749 | -3.433331 | -5.706962 |
| 72 | H | 0.814417  | -3.737757 | -4.165244 |
| 73 | H | 4.956059  | -2.792495 | -2.774450 |
| 74 | H | 3.282459  | 4.019471  | -2.999930 |
| 75 | H | 4.989437  | 4.522000  | -3.086782 |
| 76 | H | 3.859013  | 5.392981  | -2.022430 |
| 77 | H | 6.741754  | -3.064852 | -1.136761 |
| 78 | H | 5.326131  | -3.953694 | 2.840997  |
| 79 | H | -0.382495 | -3.245978 | 3.001514  |
| 80 | H | 0.599388  | -4.990476 | 4.725078  |
| 81 | H | 3.232948  | -5.157624 | 4.583466  |

-----

### DMol3/COSMO Results

| cosmo energy                    | [Hartree atomic units] | [eV]         | [kcal/mol] |
|---------------------------------|------------------------|--------------|------------|
| Total energy                    | =                      | -2424.027514 |            |
| Total energy + OC corr.         | =                      | -2424.027514 |            |
| Dielectric (solvation) energy = | -0.181222              | -4.931       | -113.72    |
| Diel. energy + OC corr. =       | -0.181222              | -4.931       | -113.72    |

### Charge partitioning by Hirshfeld method: ( 2.0016 0.0000)

|   |    |        |      |         |         |
|---|----|--------|------|---------|---------|
| C | 1  | charge | spin | 0.0740  | -0.0000 |
| C | 2  | charge | spin | -0.0395 | -0.0000 |
| C | 3  | charge | spin | -0.0241 | -0.0000 |
| C | 4  | charge | spin | -0.0143 | 0.0000  |
| C | 5  | charge | spin | 0.0840  | 0.0000  |
| C | 6  | charge | spin | -0.0675 | -0.0000 |
| C | 7  | charge | spin | 0.0396  | 0.0000  |
| C | 8  | charge | spin | -0.0182 | -0.0000 |
| C | 9  | charge | spin | 0.0827  | 0.0000  |
| O | 10 | charge | spin | -0.0476 | -0.0000 |
| C | 11 | charge | spin | -0.0316 | -0.0000 |
| C | 12 | charge | spin | -0.0406 | -0.0000 |
| C | 13 | charge | spin | 0.0720  | -0.0000 |
| C | 14 | charge | spin | -0.0691 | -0.0000 |
| N | 15 | charge | spin | 0.0084  | -0.0000 |
| N | 16 | charge | spin | 0.0094  | 0.0000  |
| C | 17 | charge | spin | 0.0040  | 0.0000  |
| C | 18 | charge | spin | 0.0039  | 0.0000  |
| C | 19 | charge | spin | -0.0989 | 0.0000  |
| C | 20 | charge | spin | -0.0990 | 0.0000  |
| C | 21 | charge | spin | 0.0036  | 0.0000  |
| C | 22 | charge | spin | 0.0033  | -0.0000 |
| C | 23 | charge | spin | -0.0982 | 0.0000  |
| C | 24 | charge | spin | 0.0127  | 0.0000  |
| C | 25 | charge | spin | -0.0011 | -0.0000 |
| C | 26 | charge | spin | 0.1285  | 0.0000  |
| N | 27 | charge | spin | -0.1420 | 0.0000  |
| C | 28 | charge | spin | -0.0248 | -0.0000 |
| C | 29 | charge | spin | -0.0205 | 0.0000  |
| C | 30 | charge | spin | -0.0242 | 0.0000  |
| C | 31 | charge | spin | -0.0278 | -0.0000 |
| O | 32 | charge | spin | -0.1852 | -0.0000 |
| N | 33 | charge | spin | 0.0183  | -0.0000 |

|    |    |        |      |         |         |
|----|----|--------|------|---------|---------|
| C  | 34 | charge | spin | 0.0462  | -0.0000 |
| C  | 35 | charge | spin | -0.0990 | -0.0000 |
| C  | 36 | charge | spin | 0.0413  | 0.0000  |
| N  | 37 | charge | spin | -0.0877 | 0.0000  |
| N  | 38 | charge | spin | -0.0003 | 0.0000  |
| C  | 39 | charge | spin | 0.0808  | 0.0000  |
| C  | 40 | charge | spin | -0.0052 | 0.0000  |
| S  | 41 | charge | spin | 0.2554  | 0.0000  |
| C  | 42 | charge | spin | -0.0113 | 0.0000  |
| C  | 43 | charge | spin | -0.0067 | 0.0000  |
| C  | 44 | charge | spin | 0.0079  | 0.0000  |
| Ni | 45 | charge | spin | 0.0975  | -0.0000 |
| H  | 46 | charge | spin | 0.0648  | 0.0000  |
| H  | 47 | charge | spin | 0.0585  | -0.0000 |
| H  | 48 | charge | spin | 0.0622  | -0.0000 |
| H  | 49 | charge | spin | 0.0505  | 0.0000  |
| H  | 50 | charge | spin | 0.0641  | -0.0000 |
| H  | 51 | charge | spin | 0.0613  | 0.0000  |
| H  | 52 | charge | spin | 0.0618  | 0.0000  |
| H  | 53 | charge | spin | 0.0562  | -0.0000 |
| H  | 54 | charge | spin | 0.0559  | 0.0000  |
| H  | 55 | charge | spin | 0.0621  | -0.0000 |
| H  | 56 | charge | spin | 0.0542  | 0.0000  |
| H  | 57 | charge | spin | 0.0450  | 0.0000  |
| H  | 58 | charge | spin | 0.0395  | 0.0000  |
| H  | 59 | charge | spin | 0.0450  | -0.0000 |
| H  | 60 | charge | spin | 0.0542  | 0.0000  |
| H  | 61 | charge | spin | 0.0396  | -0.0000 |
| H  | 62 | charge | spin | 0.0552  | -0.0000 |
| H  | 63 | charge | spin | 0.0614  | 0.0000  |
| H  | 64 | charge | spin | 0.0613  | -0.0000 |
| H  | 65 | charge | spin | 0.0543  | -0.0000 |
| H  | 66 | charge | spin | 0.0413  | -0.0000 |
| H  | 67 | charge | spin | 0.0453  | -0.0000 |
| H  | 68 | charge | spin | 0.0544  | 0.0000  |
| H  | 69 | charge | spin | 0.0602  | 0.0000  |
| H  | 70 | charge | spin | 0.0703  | -0.0000 |
| H  | 71 | charge | spin | 0.0695  | -0.0000 |
| H  | 72 | charge | spin | 0.0579  | -0.0000 |
| H  | 73 | charge | spin | 0.0918  | -0.0000 |
| H  | 74 | charge | spin | 0.0411  | 0.0000  |
| H  | 75 | charge | spin | 0.0540  | 0.0000  |
| H  | 76 | charge | spin | 0.0444  | 0.0000  |
| H  | 77 | charge | spin | 0.0885  | 0.0000  |
| H  | 78 | charge | spin | 0.1015  | -0.0000 |
| H  | 79 | charge | spin | 0.0949  | -0.0000 |
| H  | 80 | charge | spin | 0.0940  | 0.0000  |
| H  | 81 | charge | spin | 0.0983  | 0.0000  |

\*\*\*\*\*

**P1-Ni<sup>2+</sup> complex (triplet)**

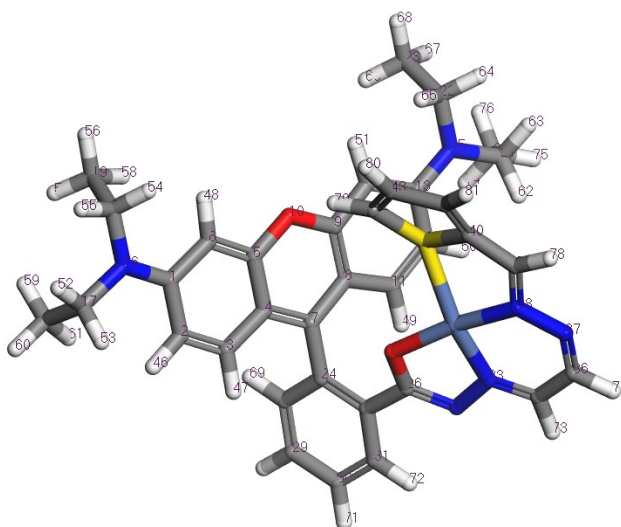

Final Coordinates (Angstroms)

|    | ATOM | X         | Y         | Z         |
|----|------|-----------|-----------|-----------|
| 1  | C    | -4.179804 | -0.168847 | 1.187979  |
| 2  | C    | -4.217120 | -1.017116 | 0.025724  |
| 3  | C    | -3.162832 | -1.066414 | -0.849575 |
| 4  | C    | -1.988002 | -0.278010 | -0.665329 |
| 5  | C    | -1.951150 | 0.516324  | 0.521594  |
| 6  | C    | -2.989769 | 0.570058  | 1.427525  |
| 7  | C    | -0.892847 | -0.252052 | -1.559863 |
| 8  | C    | 0.210953  | 0.581220  | -1.247618 |
| 9  | C    | 0.223853  | 1.305664  | -0.019757 |
| 10 | O    | -0.845284 | 1.263326  | 0.837614  |
| 11 | C    | 1.354112  | 0.746384  | -2.081786 |
| 12 | C    | 2.435417  | 1.494179  | -1.690739 |
| 13 | C    | 2.458863  | 2.160110  | -0.417084 |
| 14 | C    | 1.293231  | 2.074725  | 0.393117  |
| 15 | N    | 3.554994  | 2.847822  | -0.005087 |
| 16 | N    | -5.241350 | -0.079166 | 2.028137  |
| 17 | C    | -6.503057 | -0.798077 | 1.763945  |
| 18 | C    | -5.208466 | 0.819094  | 3.198841  |
| 19 | C    | -5.433780 | 2.294473  | 2.855993  |
| 20 | C    | -7.405239 | -0.096689 | 0.744792  |
| 21 | C    | 4.766458  | 2.947598  | -0.841681 |
| 22 | C    | 3.578381  | 3.544323  | 1.294140  |
| 23 | C    | 2.979713  | 4.952550  | 1.248612  |
| 24 | C    | -0.943075 | -1.019571 | -2.830080 |
| 25 | C    | -0.034103 | -2.059694 | -3.154832 |
| 26 | C    | 0.998495  | -2.519729 | -2.203254 |
| 27 | N    | 2.102335  | -3.085861 | -2.708523 |
| 28 | C    | -1.913322 | -0.643867 | -3.775150 |
| 29 | C    | -1.992684 | -1.274530 | -5.018854 |
| 30 | C    | -1.096759 | -2.299323 | -5.337875 |
| 31 | C    | -0.124516 | -2.681479 | -4.414604 |
| 32 | O    | 0.814448  | -2.352367 | -0.922512 |
| 33 | N    | 2.987212  | -3.318113 | -1.708712 |
| 34 | C    | 4.080941  | -4.012013 | -1.968406 |
| 35 | C    | 4.698015  | 4.042978  | -1.907642 |
| 36 | C    | 5.018542  | -4.377791 | -0.964305 |
| 37 | N    | 5.014714  | -4.169497 | 0.339679  |
| 38 | N    | 3.995838  | -3.467269 | 0.893558  |
| 39 | C    | 4.152895  | -3.245831 | 2.208647  |
| 40 | C    | 3.204257  | -2.456926 | 2.881002  |

|    |    |           |           |           |
|----|----|-----------|-----------|-----------|
| 41 | S  | 2.166524  | -1.461288 | 1.867357  |
| 42 | C  | 1.064928  | -1.183413 | 3.172129  |
| 43 | C  | 1.546407  | -1.731734 | 4.349500  |
| 44 | C  | 2.756658  | -2.443802 | 4.201664  |
| 45 | Ni | 2.435790  | -2.773861 | 0.017115  |
| 46 | H  | -5.087236 | -1.637486 | -0.171800 |
| 47 | H  | -3.220784 | -1.730033 | -1.711054 |
| 48 | H  | -2.866868 | 1.205960  | 2.299839  |
| 49 | H  | 1.369915  | 0.266293  | -3.059650 |
| 50 | H  | 3.279607  | 1.577364  | -2.369504 |
| 51 | H  | 1.204961  | 2.597968  | 1.341285  |
| 52 | H  | -7.016621 | -0.885194 | 2.728800  |
| 53 | H  | -6.263574 | -1.818926 | 1.438870  |
| 54 | H  | -4.248117 | 0.676976  | 3.714123  |
| 55 | H  | -5.988586 | 0.466336  | 3.883093  |
| 56 | H  | -5.375604 | 2.885689  | 3.781371  |
| 57 | H  | -6.424529 | 2.453479  | 2.408651  |
| 58 | H  | -4.674207 | 2.673203  | 2.158906  |
| 59 | H  | -7.686582 | 0.908933  | 1.084610  |
| 60 | H  | -8.324850 | -0.686051 | 0.621029  |
| 61 | H  | -6.916599 | -0.009783 | -0.235838 |
| 62 | H  | 4.956196  | 1.966565  | -1.298959 |
| 63 | H  | 5.599672  | 3.142736  | -0.155004 |
| 64 | H  | 4.629227  | 3.587274  | 1.606247  |
| 65 | H  | 3.057488  | 2.919980  | 2.032432  |
| 66 | H  | 1.938005  | 4.941173  | 0.898389  |
| 67 | H  | 3.558888  | 5.610479  | 0.587985  |
| 68 | H  | 2.995840  | 5.378191  | 2.262144  |
| 69 | H  | -2.598172 | 0.171808  | -3.538910 |
| 70 | H  | -2.752688 | -0.958782 | -5.734227 |
| 71 | H  | -1.152547 | -2.803470 | -6.303575 |
| 72 | H  | 0.570091  | -3.487729 | -4.648531 |
| 73 | H  | 4.244076  | -4.363776 | -2.990857 |
| 74 | H  | 3.859316  | 3.883532  | -2.599966 |
| 75 | H  | 5.632302  | 4.027452  | -2.488555 |
| 76 | H  | 4.590499  | 5.037981  | -1.454882 |
| 77 | H  | 5.866761  | -4.974968 | -1.305832 |
| 78 | H  | 4.996754  | -3.709623 | 2.722532  |
| 79 | H  | 0.191722  | -0.552426 | 3.026347  |
| 80 | H  | 1.030328  | -1.603651 | 5.299883  |
| 81 | H  | 3.255102  | -2.983973 | 5.005212  |

### DMol3/COSMO Results

| cosmo energy                    | [Hartree atomic units] | [eV]         | [kcal/mol] |
|---------------------------------|------------------------|--------------|------------|
| Total energy                    | =                      | -2424.004268 |            |
| Total energy + OC corr.         | =                      | -2424.004268 |            |
| Dielectric (solvation) energy = | -0.185840              | -5.057       | -116.62    |
| Diell. energy + OC corr. =      | -0.185840              | -5.057       | -116.62    |

### Charge partitioning by Hirshfeld method: ( 2.0016 2.0000)

|   |          |      |         |         |
|---|----------|------|---------|---------|
| C | 1 charge | spin | 0.0829  | 0.0108  |
| C | 2 charge | spin | -0.0253 | 0.0376  |
| C | 3 charge | spin | -0.0152 | -0.0033 |
| C | 4 charge | spin | 0.0010  | 0.0469  |
| C | 5 charge | spin | 0.0916  | -0.0002 |
| C | 6 charge | spin | -0.0524 | 0.0324  |
| C | 7 charge | spin | 0.0506  | -0.0043 |
| C | 8 charge | spin | -0.0030 | 0.0522  |
| C | 9 charge | spin | 0.0867  | 0.0007  |



|    |    |        |      |         |         |
|----|----|--------|------|---------|---------|
| O  | 10 | charge | spin | -0.0394 | -0.0031 |
| C  | 11 | charge | spin | -0.0202 | -0.0026 |
| C  | 12 | charge | spin | -0.0258 | 0.0409  |
| C  | 13 | charge | spin | 0.0792  | 0.0119  |
| C  | 14 | charge | spin | -0.0576 | 0.0339  |
| N  | 15 | charge | spin | 0.0314  | 0.1068  |
| N  | 16 | charge | spin | 0.0323  | 0.1002  |
| C  | 17 | charge | spin | 0.0088  | 0.0066  |
| C  | 18 | charge | spin | 0.0085  | 0.0065  |
| C  | 19 | charge | spin | -0.0948 | 0.0083  |
| C  | 20 | charge | spin | -0.0946 | 0.0085  |
| C  | 21 | charge | spin | 0.0083  | 0.0069  |
| C  | 22 | charge | spin | 0.0080  | 0.0069  |
| C  | 23 | charge | spin | -0.0941 | 0.0090  |
| C  | 24 | charge | spin | 0.0111  | 0.0064  |
| C  | 25 | charge | spin | -0.0015 | 0.0032  |
| C  | 26 | charge | spin | 0.1176  | 0.0258  |
| N  | 27 | charge | spin | -0.1481 | 0.0232  |
| C  | 28 | charge | spin | -0.0253 | -0.0005 |
| C  | 29 | charge | spin | -0.0198 | 0.0093  |
| C  | 30 | charge | spin | -0.0246 | -0.0008 |
| C  | 31 | charge | spin | -0.0279 | 0.0080  |
| O  | 32 | charge | spin | -0.2012 | 0.0449  |
| N  | 33 | charge | spin | -0.0053 | 0.0887  |
| C  | 34 | charge | spin | 0.0284  | 0.0279  |
| C  | 35 | charge | spin | -0.0944 | 0.0088  |
| C  | 36 | charge | spin | 0.0188  | 0.0299  |
| N  | 37 | charge | spin | -0.1083 | 0.0247  |
| N  | 38 | charge | spin | -0.0194 | 0.0367  |
| C  | 39 | charge | spin | 0.0516  | 0.0739  |
| C  | 40 | charge | spin | -0.0163 | 0.0145  |
| S  | 41 | charge | spin | 0.2079  | 0.0304  |
| C  | 42 | charge | spin | -0.0375 | 0.0816  |
| C  | 43 | charge | spin | -0.0276 | 0.0148  |
| C  | 44 | charge | spin | -0.0192 | 0.0786  |
| Ni | 45 | charge | spin | 0.1276  | 0.7908  |
| H  | 46 | charge | spin | 0.0709  | 0.0022  |
| H  | 47 | charge | spin | 0.0632  | -0.0003 |
| H  | 48 | charge | spin | 0.0690  | 0.0019  |
| H  | 49 | charge | spin | 0.0594  | -0.0001 |
| H  | 50 | charge | spin | 0.0706  | 0.0024  |
| H  | 51 | charge | spin | 0.0682  | 0.0021  |
| H  | 52 | charge | spin | 0.0666  | 0.0017  |
| H  | 53 | charge | spin | 0.0615  | 0.0033  |
| H  | 54 | charge | spin | 0.0609  | 0.0038  |
| H  | 55 | charge | spin | 0.0668  | 0.0013  |
| H  | 56 | charge | spin | 0.0582  | 0.0010  |
| H  | 57 | charge | spin | 0.0478  | 0.0003  |
| H  | 58 | charge | spin | 0.0425  | 0.0006  |
| H  | 59 | charge | spin | 0.0476  | 0.0003  |
| H  | 60 | charge | spin | 0.0582  | 0.0010  |
| H  | 61 | charge | spin | 0.0435  | 0.0007  |
| H  | 62 | charge | spin | 0.0604  | 0.0037  |
| H  | 63 | charge | spin | 0.0667  | 0.0017  |
| H  | 64 | charge | spin | 0.0665  | 0.0020  |
| H  | 65 | charge | spin | 0.0584  | 0.0033  |
| H  | 66 | charge | spin | 0.0444  | 0.0006  |
| H  | 67 | charge | spin | 0.0481  | 0.0003  |
| H  | 68 | charge | spin | 0.0583  | 0.0012  |
| H  | 69 | charge | spin | 0.0618  | 0.0001  |
| H  | 70 | charge | spin | 0.0704  | 0.0006  |
| H  | 71 | charge | spin | 0.0691  | -0.0001 |
| H  | 72 | charge | spin | 0.0525  | 0.0010  |
| H  | 73 | charge | spin | 0.0791  | 0.0065  |

|   |    |        |      |        |        |
|---|----|--------|------|--------|--------|
| H | 74 | charge | spin | 0.0444 | 0.0006 |
| H | 75 | charge | spin | 0.0583 | 0.0011 |
| H | 76 | charge | spin | 0.0478 | 0.0003 |
| H | 77 | charge | spin | 0.0764 | 0.0024 |
| H | 78 | charge | spin | 0.0879 | 0.0051 |
| H | 79 | charge | spin | 0.0720 | 0.0057 |
| H | 80 | charge | spin | 0.0847 | 0.0017 |
| H | 81 | charge | spin | 0.0872 | 0.0052 |

\*\*\*\*\*
